# Supplementary material
Source: HighWire-hosted journal article supplement (https://www.annfammed.org/highwire/filestream/705/field_highwire_adjunct_files/0/Hoffman-inno_Supp.pdf)
Supplement: Hoffman-inno_Supp.pdf [file Hoffman-inno_Supp.pdf]

**Supplemental materials for:**

Hoffman Mr, Golden M, Frueh J, Mirocha N, Smith T. Interdisciplinary group visits for patients with complex social needs. *Ann Fam Med*. 2020;(18)1:83.

M. Rebecca Hoffman, MD, MSPH<sup>1</sup>

Meghan Golden, LCSW<sup>1</sup>

Janice Frueh, PharmD<sup>1,2</sup>

Nichole Mirocha, DO<sup>1</sup>

Tracey Smith, DNP<sup>1</sup>

<sup>1</sup>Department of Family and Community Medicine, Southern Illinois University School of Medicine, Springfield, Illinois

<sup>2</sup>Southern Illinois University-Edwardsville School of Pharmacy, Edwardsville, Illinois

**Key words:** community health workers; social problems; patient care teams

**Funding support:** Support for community health worker involvement in this project was provided by Memorial Health Systems, Springfield IL; St. John's Hospital HSHS, Springfield IL; and United Way of Central Illinois.
